# Supplementary material
Source: MDPI journal article supplement (https://www.mdpi.com/2073-4395/12/2/485)
Supplement: s1 [file s1]

## Supplemental material

**Table S1.** Amount of C and N added to soil from the incubation of different exogenous organic matters (EOM), amount of EOM C remaining and relative variation of soil organic matter content (SOM) at the end of the incubation experiment for belowground biomass components (plant belowground organs and fine roots) of six different perennial biomass crops.

| EOM group       | Crop         | EOM type        | EOM added               |                         | Added C remaining       |      | ΔSOM |
|-----------------|--------------|-----------------|-------------------------|-------------------------|-------------------------|------|------|
|                 |              |                 | (μg C g <sup>-1</sup> ) | (μg N g <sup>-1</sup> ) | (μg C g <sup>-1</sup> ) |      | %    |
|                 |              | DoI             |                         | 30                      | 63                      |      |      |
| Woody PBCs      | Black locust | PBO (Stump)     | 4161                    | 178                     | 3068                    | 2759 | 0.33 |
|                 | Poplar       |                 | 3123                    | 60                      | 2973                    | 2787 | 0.31 |
|                 | Willow       |                 | 3161                    | 47                      | 2822                    | 2582 | 0.35 |
| Herbaceous PBCs | Miscanthus   | PBO (Rhizome)   | 4245                    | 82                      | 3662                    | 3348 | 0.51 |
|                 | Switchgrass  |                 | 1541                    | 29                      | 1296                    | 1186 | 0.09 |
|                 | Giant reed   |                 | 5564                    | 98                      | 5076                    | 4799 | 1.10 |
| Woody PBCs      | Black locust | Fine roots (FR) | 1713                    | 130                     | 1524                    |      | 0.24 |
|                 | Poplar       |                 | 1666                    | 61                      | 1506                    |      | 0.22 |
|                 | Willow       |                 | 1847                    | 60                      | 1643                    |      | 0.23 |
| Herbaceous PBCs | Miscanthus   | Fine roots (FR) | 1786                    | 47                      | 1646                    |      | 0.28 |
|                 | Switchgrass  |                 | 2112                    | 35                      | 1816                    |      | 0.31 |
|                 | Giant reed   |                 | 1982                    | 50                      | 1796                    |      | 0.26 |

**Table S2.** Analysis of variance on the effect of crop type for CO<sub>2</sub> efflux and soil parameter (DOC and DON) considered in the incubation experiment of the two components of belowground biomass: plant belowground organs and fine roots. (\*, \*\*, \*\*\* denote statistically significant differences for  $p < 0.05$ ,  $p < 0.01$  and  $p < 0.001$ , respectively).

| Parameter                         | Plant belowground organs |         |           |  | Fine roots |       |           |
|-----------------------------------|--------------------------|---------|-----------|--|------------|-------|-----------|
|                                   | Factor                   | F       | P         |  | Factor     | F     | P         |
| CO <sub>2</sub> -C after 30 DoI   | Crop                     | 52.83   | 0.001 *** |  | Crop       | 12.34 | 0.002 **  |
| CO <sub>2</sub> -C after 63 DoI   | Crop                     | 23.95   | 0.001 *** |  | Crop       |       |           |
| CO <sub>2</sub> -C % after 30 DoI | Crop                     | 54.15   | 0.001 *** |  | Crop       | 5.68  | 0.007 **  |
| CO <sub>2</sub> -C % after 63 DoI | Crop                     | 25.23   | 0.001 *** |  | Crop       |       |           |
| ΔDOC                              | Crop                     | 447.88  | 0.001 *** |  | Crop       | 0.62  | 0.68 ns   |
| ΔDON                              | Crop                     | 2085.19 | 0.001 *** |  | Crop       | 15.51 | 0.001 *** |

**Table S3** Mean values (μg g<sup>-1</sup>) of dissolved organic carbon (DOC) and nitrogen (DON) in soil at the end of incubation. Different letters show statistically different means among PBCs (Tukey's test,  $p$ : 0.05) for each parameter within the same EOM type.

| EOM group       | Crop         | EOM type       | DOC                     |    | DON                     |   |
|-----------------|--------------|----------------|-------------------------|----|-------------------------|---|
|                 |              |                | (μg C g <sup>-1</sup> ) |    | (μg N g <sup>-1</sup> ) |   |
|                 | Control      | Soil           | 57.9                    | a  | 37.8                    | e |
| Woody PBCs      | Black locust | PBO (Stump)    | 83.1                    | d  | 31.5                    | d |
|                 | Poplar       | PBO (Stump)    | 69.0                    | c  | 16.0                    | b |
|                 | Willow       | PBO (Stump)    | 63.9                    | b  | 8.0                     | a |
| Herbaceous PBCs | Miscanthus   | PBO (Rhizomes) | 76.8                    | d  | 10.2                    | b |
|                 | Switchgrass  | PBO (Rhizomes) | 63.2                    | b  | 16.5                    | c |
|                 | Giant reed   | PBO (Rhizomes) | 97.9                    | e  | 10.4                    | b |
|                 | Control      | Soil           | 121.5                   | a  | 34.1                    | b |
| Woody PBCs      | Black locust | Fine roots     | 135.3                   | b  | 42.1                    | c |
|                 | Poplar       | Fine roots     | 127.2                   | ab | 34.2                    | b |
|                 | Willow       | Fine roots     | 124.8                   | ab | 31.8                    | b |
| Herbaceous PBCs | Miscanthus   | Fine roots     | 125.9                   | ab | 31.8                    | b |
|                 | Switchgrass  | Fine roots     | 133.4                   | ab | 24.5                    | a |
|                 | Giant reed   | Fine roots     | 129.7                   | ab | 33.2                    | b |

**Table S4.** Mean values of partitioning factor ( $f$ ) and decomposition rate constant ( $K$ ) for different exogenous organic matter types as obtained by the improved version of the RothC model (Mondini et al., 2017).

| EOM group       | EOM type        | Crop         | $f_{\text{DEOM}}$ | $f_{\text{REOM}}$ | DEOM/REOM   | $K_{\text{DEOM}}$ | $K_{\text{REOM}}$ |
|-----------------|-----------------|--------------|-------------------|-------------------|-------------|-------------------|-------------------|
| Woody PBCs      | Stump           | Black locust | 0.39              | 0.61              | 0.64        | 7.9               | 0.39              |
|                 |                 | Poplar       | 0.04              | 0.96              | 0.04        | 30.9              | 0.49              |
|                 |                 | Willow       | 0.04              | 0.96              | 0.04        | 19.2              | 0.45              |
|                 |                 | <b>Mean</b>  | <b>0.16</b>       | <b>0.84</b>       | <b>0.19</b> | <b>19.33</b>      | <b>0.44</b>       |
| Herbaceous PBCs | Rhizomes        | Miscanthus   | 0.08              | 0.92              | 0.09        | 19.6              | 0.47              |
|                 |                 | Switchgrass  | 0.22              | 0.78              | 0.28        | 5.9               | 0.26              |
|                 |                 | Giant reed   | 0.05              | 0.95              | 0.05        | 41.9              | 0.28              |
|                 |                 | <b>Mean</b>  | <b>0.12</b>       | <b>0.88</b>       | <b>0.14</b> | <b>22.47</b>      | <b>0.34</b>       |
| Woody PBCs      | Fine roots (FR) | Black locust | 0.10              | 0.90              | 0.11        | 19.5              | 0.21              |
|                 |                 | Poplar       | 0.10              | 0.90              | 0.11        | 13.4              | 0.13              |
|                 |                 | Willow       | 0.14              | 0.86              | 0.16        | 11.8              | 0.08              |
|                 |                 | <b>Mean</b>  | <b>0.11</b>       | <b>0.89</b>       | <b>0.12</b> | <b>14.90</b>      | <b>0.14</b>       |
| Herbaceous PBCs | Fine roots (FR) | Miscanthus   | 0.12              | 0.88              | 0.14        | 7.3               | 0.02              |
|                 |                 | Switchgrass  | 0.17              | 0.83              | 0.20        | 12.7              | 0.11              |
|                 |                 | Giant reed   | 0.14              | 0.86              | 0.16        | 7.6               | 0.02              |
|                 |                 | <b>Mean</b>  | <b>0.14</b>       | <b>0.86</b>       | <b>0.16</b> | <b>9.20</b>       | <b>0.05</b>       |
| <b>PBCs</b>     | <b>PBO</b>      | <b>Mean</b>  | <b>0.14</b>       | <b>0.86</b>       | <b>0.19</b> | <b>20.90</b>      | <b>0.39</b>       |
|                 | <b>FR</b>       | <b>Mean</b>  | <b>0.13</b>       | <b>0.87</b>       | <b>0.15</b> | <b>12.05</b>      | <b>0.10</b>       |

PBO: plant belowground organs; EOM: exogenous organic matter; DEOM: decomposable EOM; REOM: resistant EOM;  $f$ : partitioning factor;  $K$ : decomposition constant rate ( $\text{yr}^{-1}$ ). DEOM/REOM:  $f_{\text{DEOM}}/f_{\text{REOM}}$ .
